# Supplementary material for: Novel Fredericamycin Variant Overproduced by a Streptomycin-Resistant Streptomyces albus subsp. chlorinus Strain
Source: PubMed Central journal article supplement (PMC7345809; doi:10.3390/md18060284), 2020-05-28
Supplement: marinedrugs-18-00284-s001.pdf [file marinedrugs-18-00284-s001.pdf]

1 **Supplementary Information**2 **Novel Fredericamycin Variant Overproduced by a**  
3 **Streptomycin-Resistant *Streptomyces albus* subsp.**  
4 ***chlorinus* Strain**5 **Marta Rodríguez Estévez**<sup>1</sup>, **Maksym Myronovskiy**<sup>1</sup>, **Birgit Rosenkränzer**, **Thomas Paululat**<sup>2</sup>,  
6 **Lutz Petzke**<sup>3</sup>, **Jeanette Ristau**<sup>3</sup>, **Andriy Luzhetskyy**<sup>1,4,\*</sup>7 <sup>1</sup> Pharmazeutische Biotechnologie, Universität des Saarlandes, 66123 Saarbrücken, Germany;

8 marta.rodriguezestevez@uni-saarland.de (M.R.E.); maksym.myronovskiy@uni-saarland.de (M.M.)

9 <sup>2</sup> Organische Chemie II, Universität Siegen, 57068 Siegen, Germany; paululat@chemie.uni-siegen.de10 <sup>3</sup> BASF SE, 67056 Ludwigshafen, Germany11 <sup>4</sup> Helmholtz-Institut für Pharmazeutische Forschung Saarland, 66123 Saarbrücken, Germany

12 \* Correspondence: a.luzhetskyy@mx.uni-saarland.de; Tel.: +49-0681-70223

13

14 **Tables**15 **Table S1.** Streptomycin MICs for *S. albus* subsp. *chlorinus* and *S. albus* subsp. *chlorinus* JR1.

| Strain                                                            | MIC (µg/ml) |
|-------------------------------------------------------------------|-------------|
| <i>Streptomyces albus</i> subsp.<br><i>chlorinus</i> NRRL B-24108 | < 50        |
| <i>Streptomyces albus</i> subsp.<br><i>chlorinus</i> JR1          | 200         |

16

17 **Table S2.** Quantification of fredericamycin C<sub>2</sub> produced by *S. albus* subsp. *chlorinus* JR1 and the parental strain  
18 *S. albus* subsp. *chlorinus* NRRL B-24108.

| Strain                                                         | Peak area (AU) <sup>a</sup> | Fredericamycin C <sub>2</sub> concentration (μM) <sup>a b</sup> |
|----------------------------------------------------------------|-----------------------------|-----------------------------------------------------------------|
| <i>Streptomyces albus</i> subsp. <i>chlorinus</i> JR1          | 571,003,904                 | 773.25 (0.1)                                                    |
| <i>Streptomyces albus</i> subsp. <i>chlorinus</i> NRRL B-24108 | 10,157,194                  | 14.08 (0.0)                                                     |

19 <sup>a</sup>Values indicate the average of three independent measurements

20 <sup>b</sup>Standard deviation values are shown in parentheses

21

22

23

**Table S3.** Type and location of point mutations in the genome of *S. albus* subsp. *chlorinus* JR1.

| Position (bp) | Strain | Sequence (5' → 3')            | Type of mutation   |
|---------------|--------|-------------------------------|--------------------|
| 30077         | WT     | 30068-CGGGGGGGGGA-30079       | G insertion        |
|               | mutant | 30068-CGGGGGGGGGGA-30080      |                    |
| 636229        | WT     | 363224-CCCTCCTCGA-636233      | C deletion         |
|               | mutant | 363224-CCCTCTCGA-636232       |                    |
| 685900        | WT     | 685893-GGCGGGGCGG-685902      | G insertion        |
|               | mutant | 685893-GGCGGGGCGG-685903      |                    |
| 1120949       | WT     | 1120943-GGCCTGTAC-1120952     | G deletion         |
|               | mutant | 1120943-GGCCTGTAC-1120951     |                    |
| 1922752       | WT     | 1922746-CCCGCGAGCG-1922755    | A deletion         |
|               | mutant | 1922746-CCCGCGGCG-1922754     |                    |
| 2222897       | WT     | 2222890-GCCCCCCCGG-2222899    | C deletion         |
|               | mutant | 2222890-GCCCCCCGG-2222898     |                    |
| 2548236       | WT     | 2548230-CTCCGCGAGC-2548239    | G deletion         |
|               | mutant | 2548230-CTCCGCAGC-2548238     |                    |
| 3714884       | WT     | 3714886-CGACCGTGCC-3714877    | C insertion        |
|               | mutant | 3714886-CGACCCGTGCC-3714876   |                    |
| 5766153       | WT     | 5766149-GAGTGC GCGC-5766158   | G → C substitution |
|               | mutant | 5766149-GAGTCCGCGC-5766158    |                    |
| 5766154       | WT     | 5766149-GAGTGC GCGC-5766158   | C → G substitution |
|               | mutant | 5766149-GAGTCGGCGC-5766158    |                    |
| 5766161       | WT     | 5766156-CGCCGCGCCG-5766165    | G deletion         |
|               | mutant | 5766156-CGCCCCCGG-5766164     |                    |
| 5790341       | WT     | 5790331-CGGGGGGGGGGT-5790342  | G insertion        |
|               | mutant | 5790331-CGGGGGGGGGGGT-5790343 |                    |
| 6179245       | WT     | 6179240-GGGCCGCACC-6179249    | G → C substitution |
|               | mutant | 6179240-GGGCCCACC-6179249     |                    |
| 6213269       | WT     | 6213264-TCCGCGCTG-6213273     | C deletion         |

|         |        |                           |            |
|---------|--------|---------------------------|------------|
|         | mutant | 6213264-TCCGCGCTG-6213272 |            |
| 7015221 | WT     | 7015216-CCTTCACCC-7015225 |            |
|         | mutant | 7015216-CCTTCACCC-7015224 | C deletion |

24

25

26

**Table S4.** Bacterial strains and BACs used in this work.

| <b>Bacterial strain</b>                                        | <b>Features</b>                                                                  | <b>Reference/Source</b> |
|----------------------------------------------------------------|----------------------------------------------------------------------------------|-------------------------|
| <i>Streptomyces albus</i> subsp. <i>chlorinus</i> NRRL B-24108 | Strain harboring fredericamycin biosynthetic gene cluster                        | [2]                     |
| <i>Streptomyces albus</i> subsp. <i>chlorinus</i> JR1          | Streptomycin-resistant mutant strain overproducing fredericamycin C <sub>2</sub> | This work               |
| <i>Streptomyces albus</i> Del14                                | Heterologous expression host                                                     | [3]                     |
| <i>Streptomyces albus</i> 2P5                                  | <i>S. albus</i> Del14 strain harboring BAC 2P5                                   | This work               |
| <i>Escherichia coli</i> ET12567 pUB307                         | Donor strain for intergeneric conjugation                                        | [4]                     |
| <i>Escherichia coli</i> DH10 $\beta$                           | General cloning strain                                                           | [5]                     |
| <b>BACs</b>                                                    |                                                                                  |                         |
| pSMART                                                         | AmR; BAC vector                                                                  | Lucigen (USA)           |
| 2P5                                                            | BAC containing fredericamycin gene cluster                                       | Intact Genomics (USA)   |

27

28 **Figures**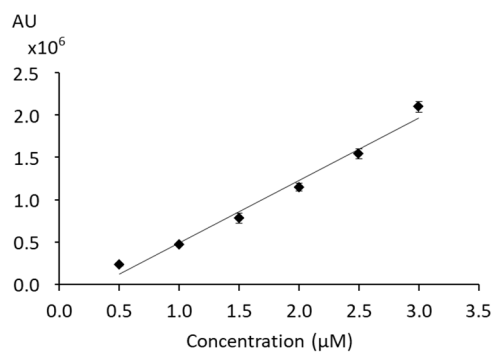

29

30 **Figure S1.** Calibration curve for fredericamycin C<sub>2</sub> quantification. Peak area is represented against  
31 fredericamycin C<sub>2</sub> concentration (μM). The values represent the average of three independent measurements.  
32 The black line shows the trendline that leads to the equation:  $y = 7.38 * 10^5 x - 2.49 * 10^5$ .

33

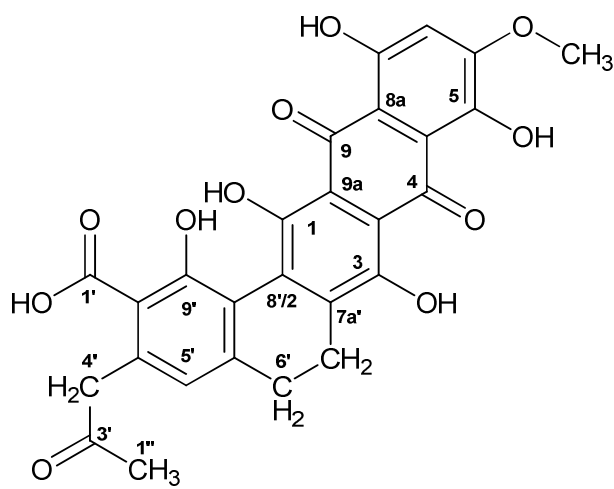

34

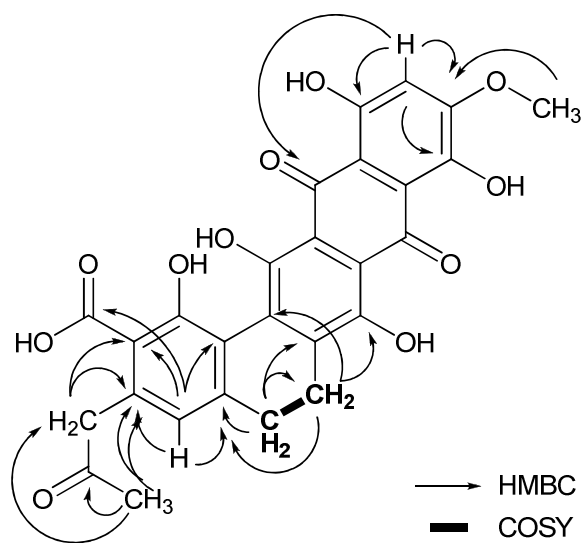

35

36

**Figure S2.** Important 2D NMR correlations in fredericamycin C<sub>2</sub>.

37

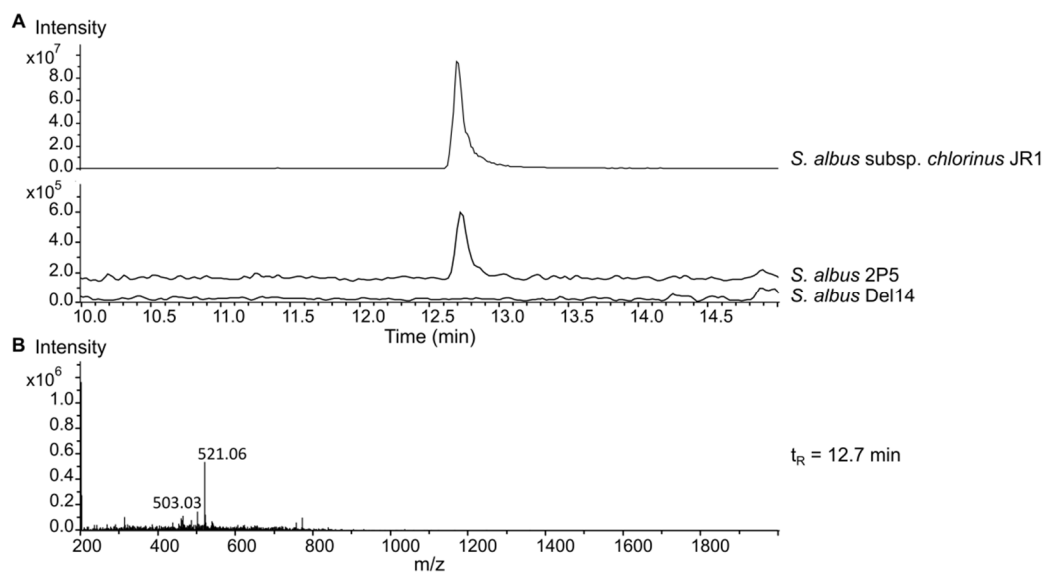

38

39 **Figure S3.** HPLC-MS chromatograms of crude extracts from *S. albus* subsp. *chlorinus* JR1, *S. albus* 2P5, and its  
40 parental strain *S. albus* Del14. (A) Extracted ion chromatograms (521.12  $\pm$  0.1 Da). (B) Mass spectrum  
41 corresponding to  $t_R = 12.7$  min from *S. albus* 2P5 chromatogram displayed in A.

42



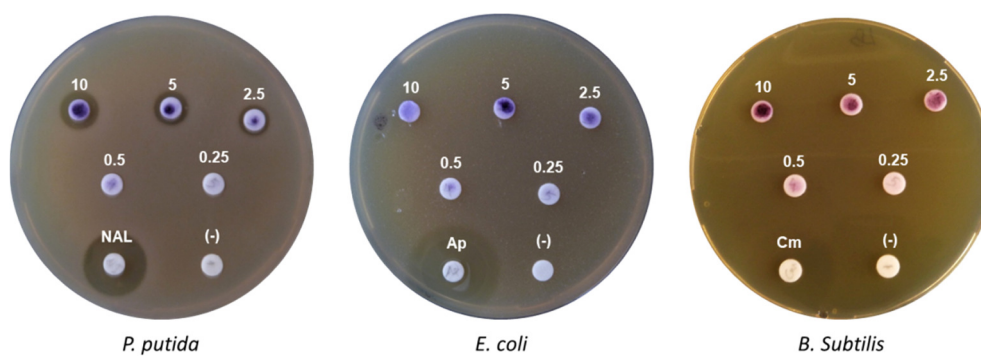

43

44 **Figure S4.** Antibacterial evaluation of fredericamycin C<sub>2</sub>. Disk diffusion tests against *Pseudomonas putida*,  
45 *Escherichia coli*, and *Bacillus subtilis* are shown. Fredericamycin C<sub>2</sub> solved in methanol was loaded onto paper  
46 disks at concentrations of 10 mg/ml, 5, 2.5, 0.5, and 0.25 mg/ml. NAL: nalidixic acid; Ap: ampicillin; Cm:  
47 chloramphenicol; (-): negative control (methanol).

48

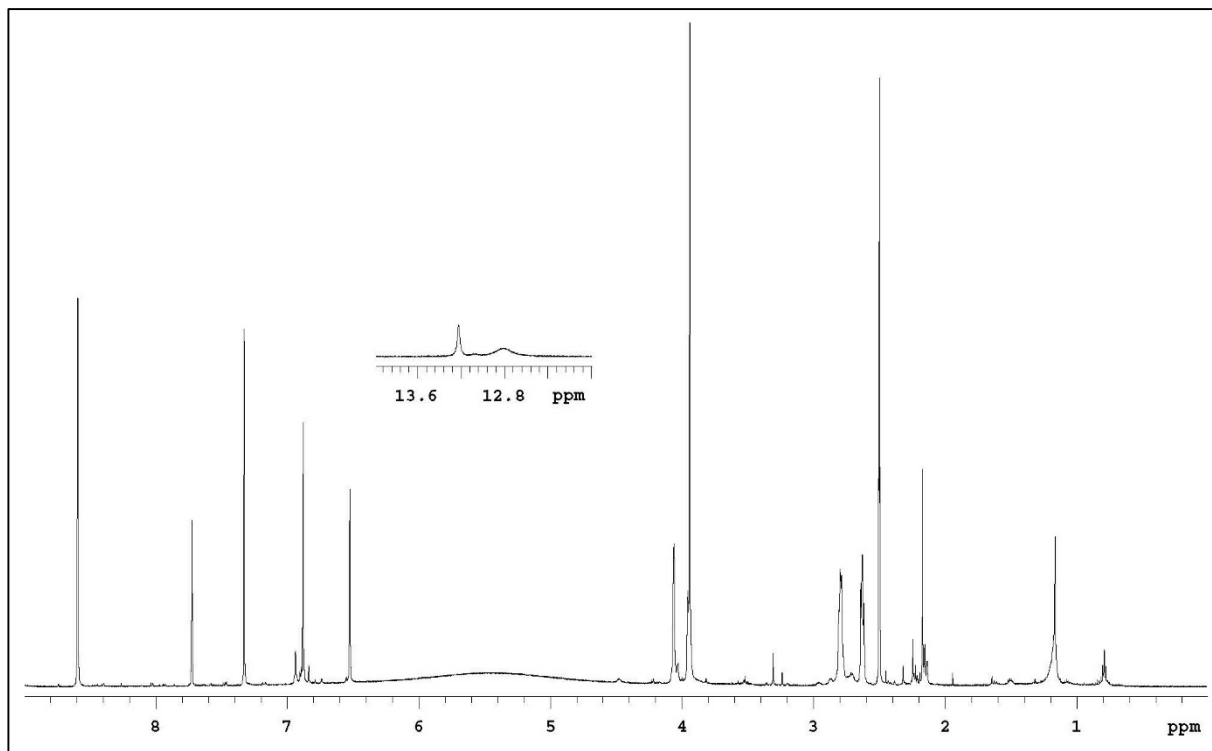

49

50

51

**Figure S5.** <sup>1</sup>H NMR (600 MHz, DMSO-d<sub>6</sub>/Pyridine-d<sub>5</sub> 95:5, 35 °C).

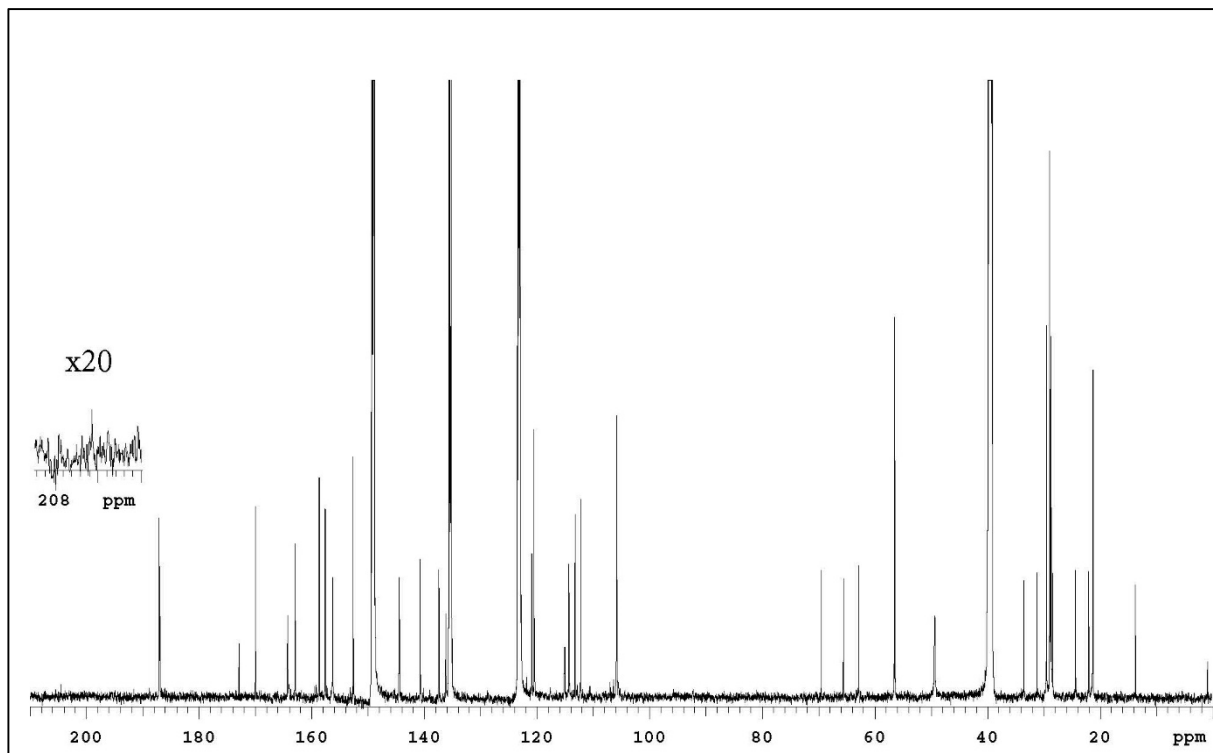

52

**Figure S6.** <sup>13</sup>C NMR (150 MHz, DMSO-d<sub>6</sub>/Pyridine-d<sub>5</sub> 95:5, 35 °C).

53

54

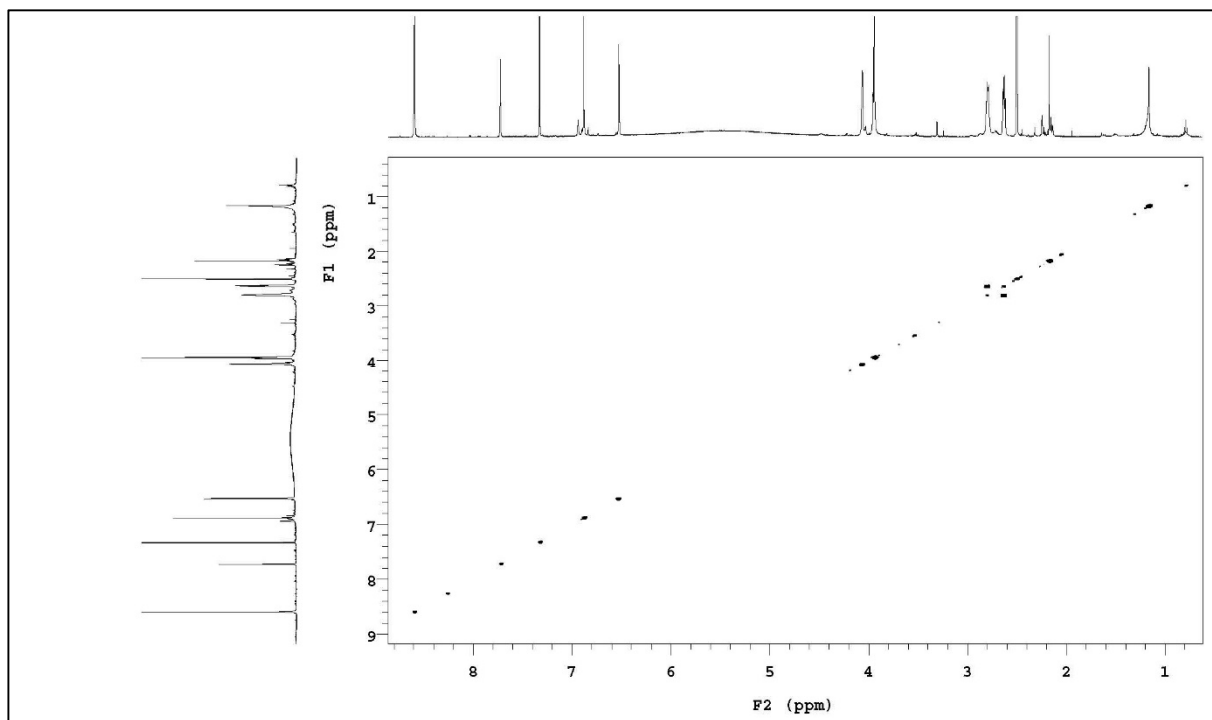

55

56

**Figure S7.** COSY NMR (600 MHz, DMSO-d<sub>6</sub>/Pyridine-d<sub>5</sub> 95:5, 35 °C).

57

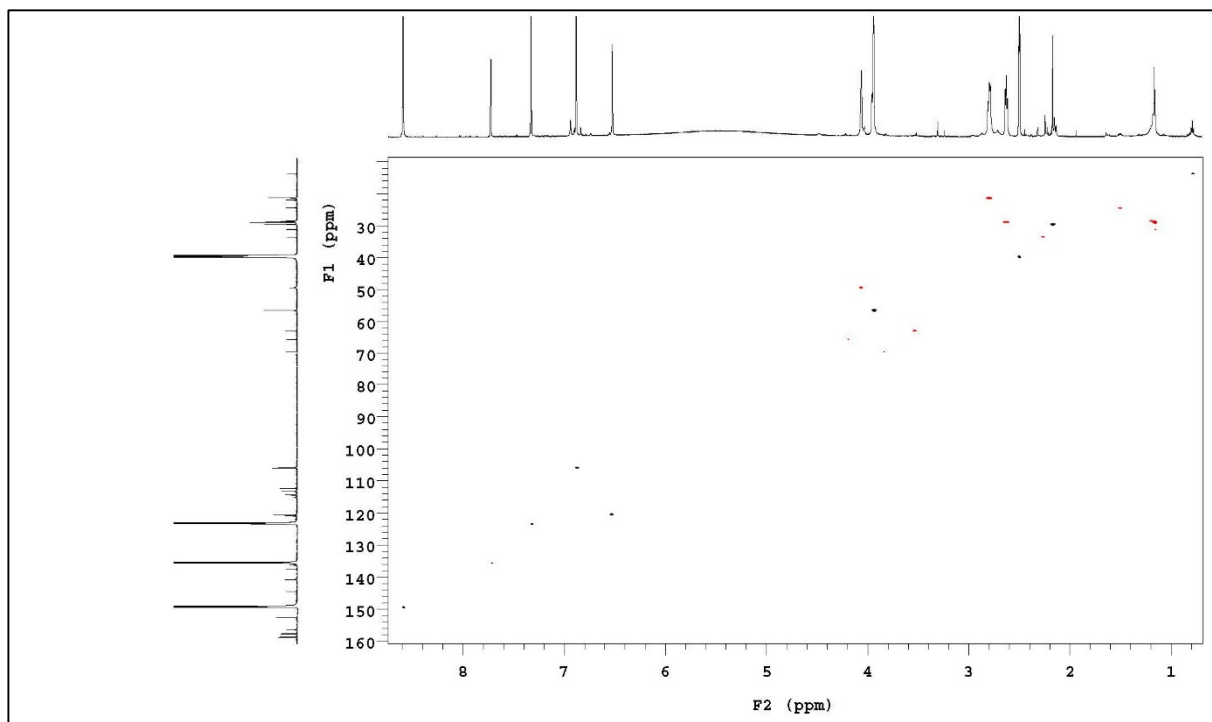

58

59

60

Figure S8. HSQC NMR (600 MHz, DMSO-d<sub>6</sub>/Pyridine-d<sub>5</sub> 95:5, 35 °C).

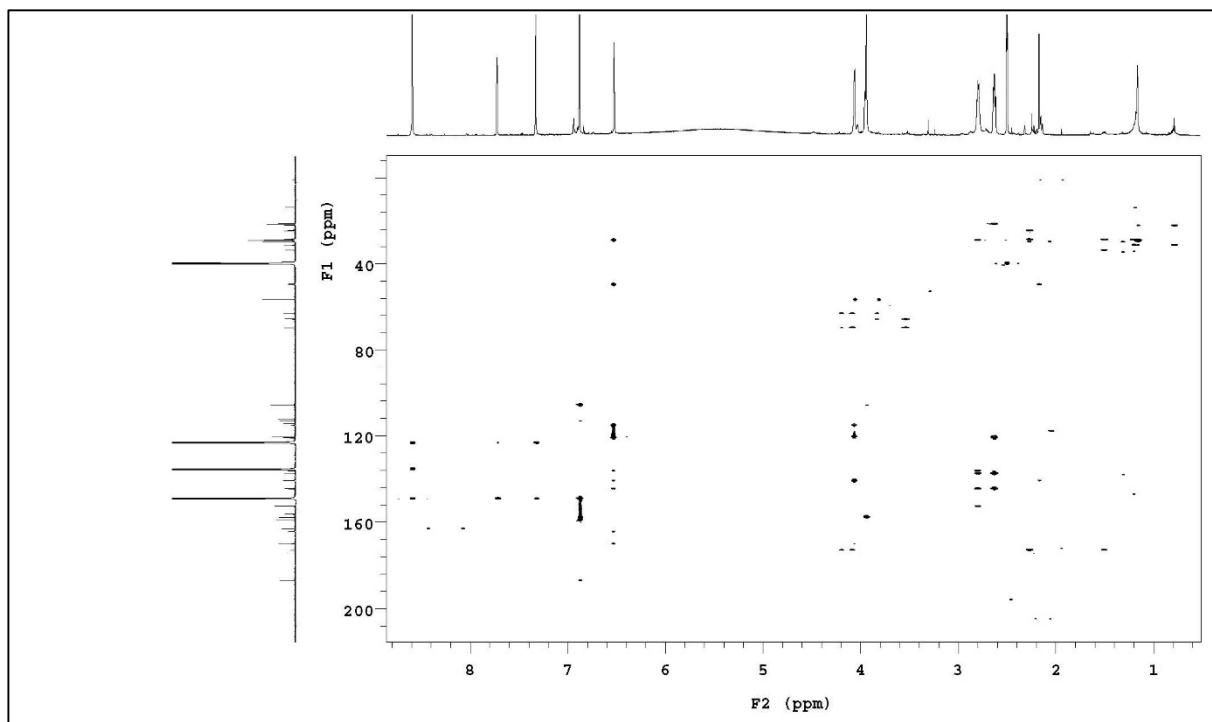

61

62

**Figure S9.** HMBC NMR (600 MHz, DMSO-d<sub>6</sub>/Pyridine-d<sub>5</sub> 95:5, 35 °C).

63

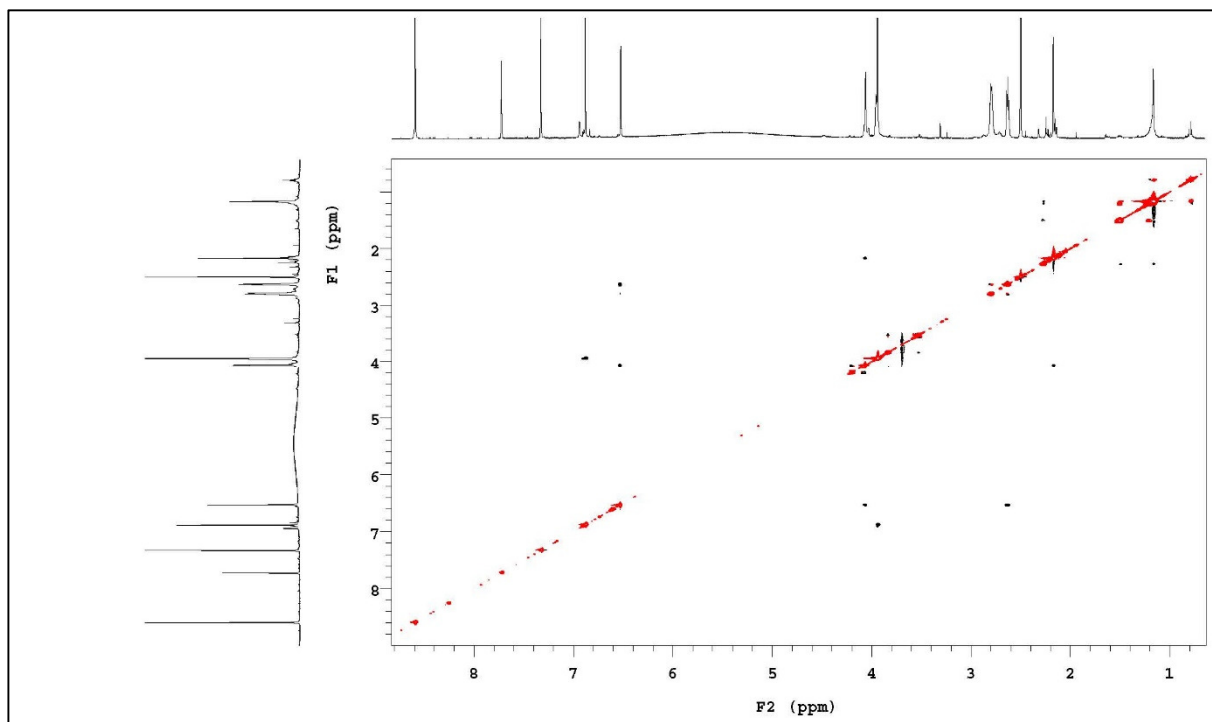

64

65

Figure S10. ROESY NMR (600 MHz, DMSO-d<sub>6</sub>/Pyridine-d<sub>5</sub> 95:5, 35 °C).

66

67 **References**

- 68 1. Sontag, B.; Muller, J.G.; Hansske, F.G. Fredericamycin B and C from *Streptomyces griseus*:  
69 structure elucidation after 23 years. *J. Antibiot.* **2004**, *57*, 823-828.
- 70 2. Hahn, D.R.; Graupner, P.R.; Chapin, E.; Gray, J.; Heim, D.; Gilbert, J.R.; Gerwick, B.C.  
71 Albugidin: a novel bleaching herbicide from *Streptomyces albus* subsp. *chlorinus* NRRL  
72 B-24108. *The Journal of antibiotics* **2009**, *62*, 191-194, doi:10.1038/ja.2009.11.
- 73 3. Myronovskyi, M.; Rosenkränzer, B.; Nadmid, S.; Pujic, P.; Normand, P.; Luzhetskyy, A.  
74 Generation of a cluster-free *Streptomyces albus* chassis strains for improved heterologous  
75 expression of secondary metabolite clusters. *Metab. Eng.* **2018**, 10.1016/j.ymben.2018.09.004,  
76 doi:10.1016/j.ymben.2018.09.004.
- 77 4. Flett, F.; Mersinias, V.; Smith, C.P. High efficiency intergeneric conjugal transfer of plasmid  
78 DNA from *Escherichia coli* to methyl DNA-restricting streptomycetes. *FEMS Microbiol. Lett.*  
79 **1997**, *155*, 223-229.
- 80 5. Grant, S.G.; Jessee, J.; Bloom, F.R.; Hanahan, D. Differential plasmid rescue from transgenic  
81 mouse DNAs into *Escherichia coli* methylation-restriction mutants. *Proc. Natl. Acad. Sci. USA*  
82 **1990**, *87*, 4645-4649.

83
